# Supplementary material for: Differential Requirement of Cd8 Enhancers E8I and E8VI in Cytotoxic Lineage T Cells and in Intestinal Intraepithelial Lymphocytes
Source: PubMed Central journal article supplement (PMC6421288; doi:10.3389/fimmu.2019.00409), 2019-03-11
Supplement: Data_Sheet_1.pdf [file Data_Sheet_1.pdf]

## *Supplementary Material*

### **Differential requirement of *Cd8* enhancers E8<sub>I</sub> and E8<sub>VI</sub> in cytotoxic lineage T cells and in intestinal intraepithelial lymphocytes.**

**Alexandra Franziska Gülich<sup>1</sup>, Teresa Preglej<sup>1,5</sup>, Patricia Hamminger<sup>1,5</sup>, Marlis Alteneder<sup>1</sup>, Caroline Tizian<sup>1,3</sup>, Maria Jonah Orola<sup>1,4</sup>, Sawako Muroi<sup>2</sup>, Ichiro Taniuchi<sup>2</sup>, Wilfried Ellmeier<sup>1\*</sup>, Shinya Sakaguchi<sup>1\*</sup>**

<sup>1</sup>Division of Immunobiology, Institute of Immunology, Center for Pathophysiology, Infectiology and Immunology, Medical University of Vienna, Vienna, Austria.

<sup>2</sup>Laboratory for Transcriptional Regulation, RIKEN Center for Integrative Medical Sciences (IMS), Yokohama, Japan.

<sup>3</sup>Present address: Institute of Microbiology, Infectious Diseases and Immunology, Charité - University Medicine Berlin, Berlin, Germany

<sup>4</sup>Present address: Institute of Specific Prophylaxis and Tropical Medicine, Center for Pathophysiology, Infectiology and Immunology, Medical University of Vienna, Vienna, Austria.

<sup>5</sup>These authors contributed equally to this work

**\* Correspondence:**

Wilfried Ellmeier: [wilfried.ellmeier@meduniwien.ac.at](mailto:wilfried.ellmeier@meduniwien.ac.at)

Shinya Sakaguchi: [shinya.sakaguchi@meduniwien.ac.at](mailto:shinya.sakaguchi@meduniwien.ac.at)

## Supplementary Figures

Figure S1

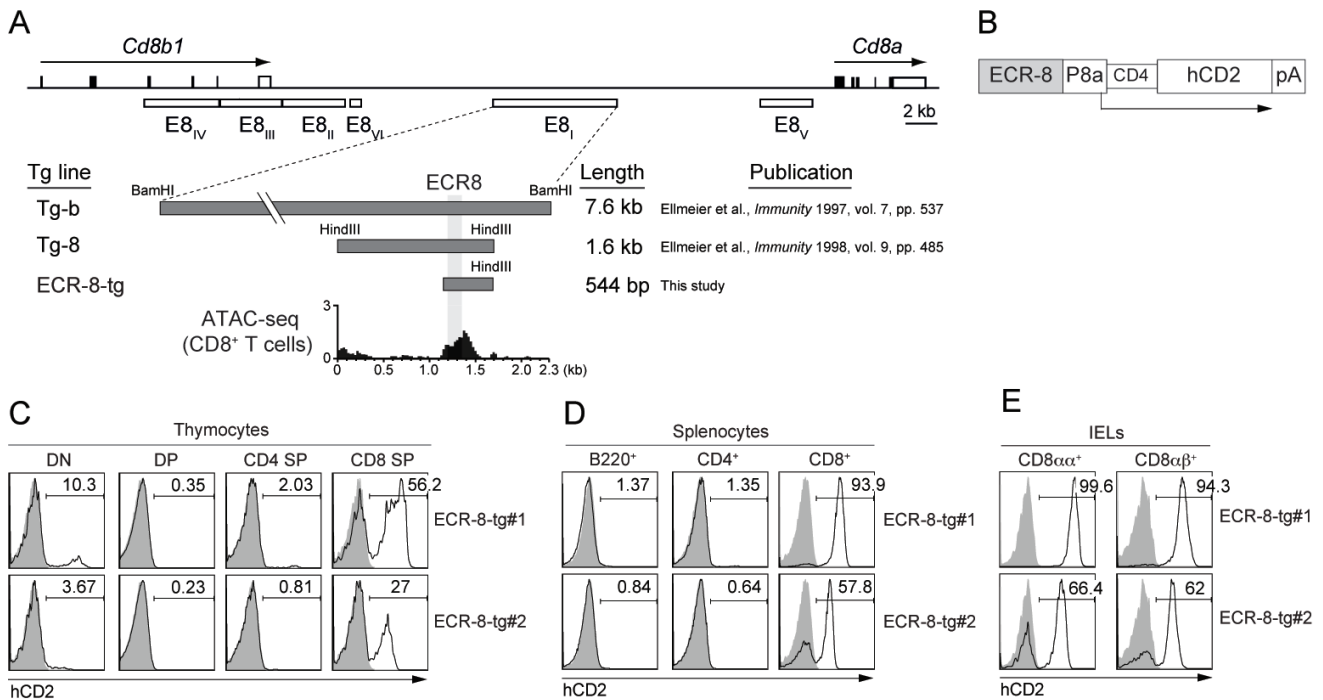

**Figure S1.** Generation and characterization of E8<sub>I</sub>-core-transgenic (Tg) mice. **(A)** Schematic map of the *Cd8a* and *Cd8b1* gene loci (after Gorman et al. (1)). Horizontal arrows indicate the transcriptional orientation of the *Cd8a* and *Cd8b1* genes. The open bars below the *Cd8ab* gene complex indicate the location of *Cd8* enhancers E8<sub>I</sub>, to E8<sub>V</sub>. The lower panel indicates the transgenic constructs (including their size in kb) used to narrow down the core region of E8<sub>I</sub>. The location of ECR-8 is indicated as a gray bar, and ATAC-seq peaks (in naïve CD8<sup>+</sup> T cells) surrounding ECR-8 are shown at the bottom. **(B)** Map of the transgenic constructs used to test the enhancer activity of E8<sub>I</sub>-core region (2). P8a: *Cd8a* promoter, CD4: murine *Cd4* splicing module (consist of the untranslated exon I, part of intron I, and part of exon II), hCD2: human CD2 reporter gene cDNA, pA: SV40 polyadenylation sequence. **(C)** Histograms showing human CD2 (hCD2) expression on double-negative (DN), double-positive (DP), CD4 single-positive (SP) and CD8SP thymocyte subsets isolated from E8<sub>I</sub>-core transgenic lines tg#1 and tg#2. **(D)** Histograms showing hCD2 expression on B220<sup>+</sup> B cells, and on CD4<sup>+</sup> and CD8<sup>+</sup> T cells (TCR $\beta^+$ ) isolated from the spleen of E8<sub>I</sub>-core transgenic lines tg#1 and tg#2. **(E)** Histograms showing hCD2 expression in CD8 $\alpha\alpha^+$  (left panels) and CD8 $\alpha\beta^+$  (right panels) intraepithelial lymphocytes (IELs) isolated from the small intestine of E8<sub>I</sub>-core transgenic lines tg#1 and tg#2. **(C,D,E)** Numbers in the histograms indicate the percentage of hCD2<sup>+</sup> cells. Filled histograms show a non-transgenic control. Data are representative of 6 (tg#1) and 4 (tg#2) (C,D) and 4 (E) independent experiments.

## Figure S2

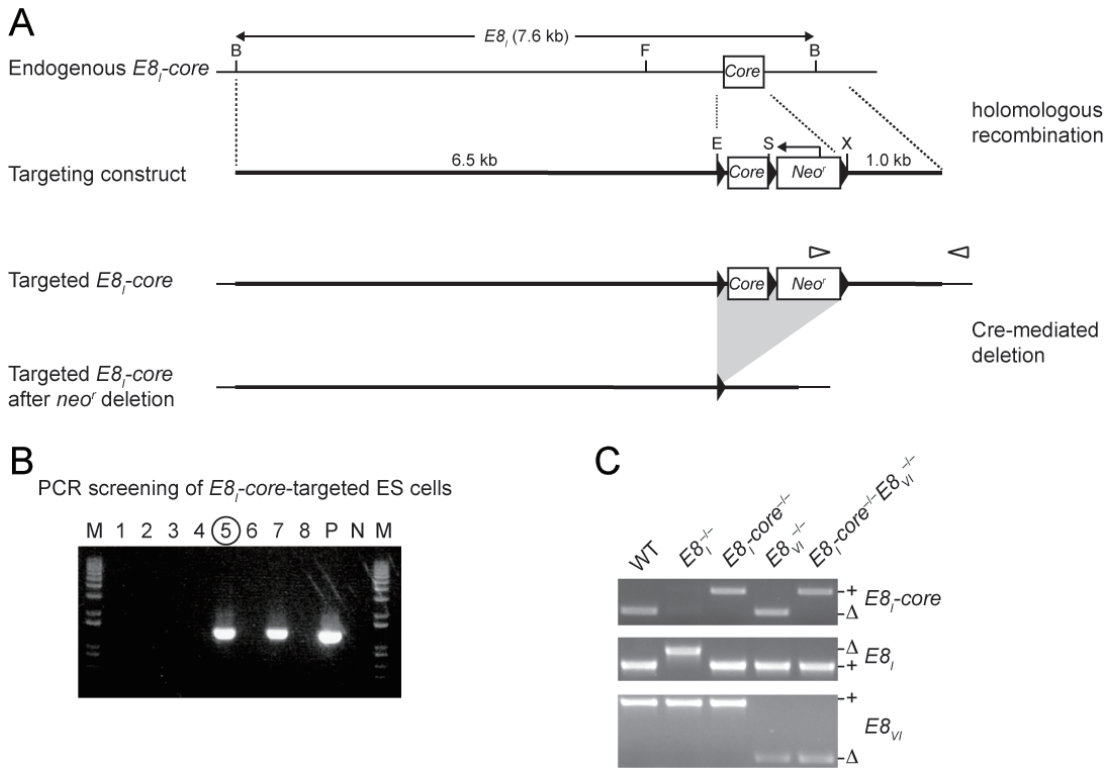

**Figure S2.** Generation of  $E8_I$ -core $^{-/-}$  and  $E8_I$ -core $^{-/-}E8_{VI}^{-/-}$  mice. **(A)** Targeting strategy for the generation of  $E8_I$ -core $^{-/-}$  mice. Schematic map shows the endogenous  $E8_I$ -core region (top), the targeting construct (upper middle), the targeted  $E8_I$ -core after homologous recombination (lower middle), and the targeted  $E8_I$ -core after Cre recombinase-mediated deletion of the neomycin cassette (bottom). All restriction sites of BamHI (B) and FspI (F), and EcoRI (E), SalI (S) and XhoI (X) sites important for the construction of the targeting vector are shown. Open arrowheads indicate the location of the PCR primers used for the screening of homologous recombination. The horizontal thick black lines and filled triangles indicate the arms of homology and loxP sites, respectively. *Core*,  $E8_I$ -core region; *Neo<sup>r</sup>*, the neomycin cassette. **(B)** Gel image showing the PCR screening of ES clones that underwent homologous recombination. After PCR prescreening of pooled DNA samples from 8 ES clones, 8 individual clones from the positive group (indicated as 1 to 8) were further screened. No. 5 ES clone (indicated by a circle) was used for the generation of  $E8_I$ -core $^{-/-}$  mice. P, positive control for PCR; N, no template control; M, size markers. **(C)** Gel image showing genotyping PCRs to detect the  $E8_I$ -core-null (upper panel),  $E8_I$ -null (middle panel) and  $E8_{VI}$ -null (lower panel) alleles with wild-type (WT),  $E8_I^{-/-}$ ,  $E8_I$ -core $^{-/-}$ ,  $E8_{VI}^{-/-}$  and  $E8_I$ -core $^{-/-}E8_{VI}^{-/-}$  mouse tail samples. The sizes of PCR products corresponding to the wild-type and mutant alleles in each PCR are indicated as + and  $\Delta$ , respectively. Note that there is no PCR amplification in  $E8_I^{-/-}$  mouse sample, due to the deletion of the primer-binding regions. Data are representative of three independent experiments.

Figure S3

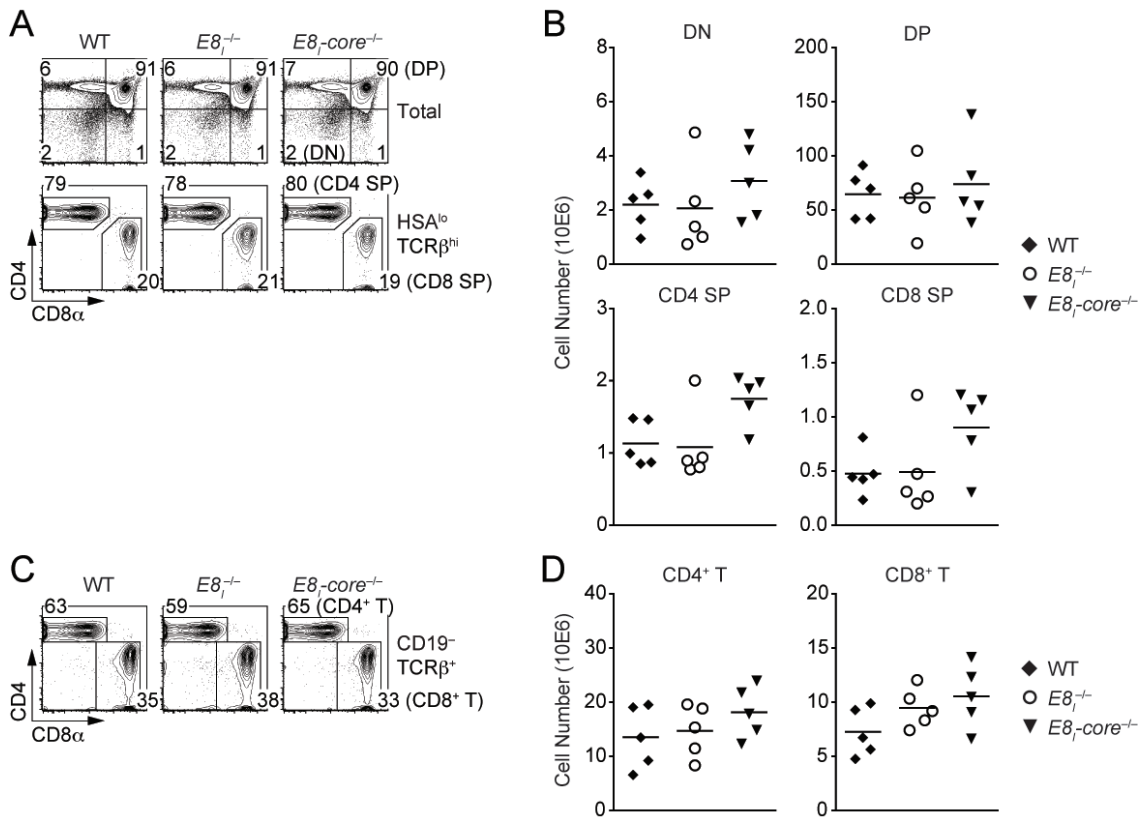

**Figure S3.** Characterization of  $E8_I^{-/-}$  mice. **(A)** Flow cytometry analysis showing CD8 $\alpha$  and CD4 expression on total (upper panel) and HSA<sup>lo</sup>TCR $\beta^{\text{hi}}$  (lower panel) thymocytes isolated from wild-type (WT),  $E8_I^{-/-}$  and  $E8_I\text{-core}^{-/-}$  mice. CD8 $\alpha$  expression on CD8 SP thymocytes (CD8 SP) is displayed in Figure 2A. **(B)** Diagrams showing the numbers of DN (upper left), DP (upper right), CD4 SP (lower left) CD8 SP (lower right) thymocytes isolated from wild-type (WT),  $E8_I^{-/-}$  and  $E8_I\text{-core}^{-/-}$  mice. **(C)** Flow cytometry analysis showing CD8 $\alpha$  and CD4 expression on CD19<sup>-</sup>TCR $\beta^{\text{+}}$  splenocytes isolated from wild-type (WT),  $E8_I^{-/-}$  and  $E8_I\text{-core}^{-/-}$  mice. CD8 $\alpha$  expression on CD8<sup>+</sup> T cells (CD8<sup>+</sup> T) is displayed in Figure 2A. **(D)** Diagrams showing the numbers of CD4<sup>+</sup> (left), CD8<sup>+</sup> (right) T cells isolated from wild-type (WT),  $E8_I^{-/-}$  and  $E8_I\text{-core}^{-/-}$  mice. **(A,C)** Numbers indicate the percentages within the respective regions. Data are representative of 5 mice analyzed in 5 independent experiments. **(B,D)** Each dot represents one mouse. Horizontal bars indicate mean values. A one-way ANOVA analysis followed by Tukey's multiple-comparison test was performed for statistical analysis. No comparison between two groups reached a statistically significant level (i.e.  $p < 0.05$ ).

Figure S4

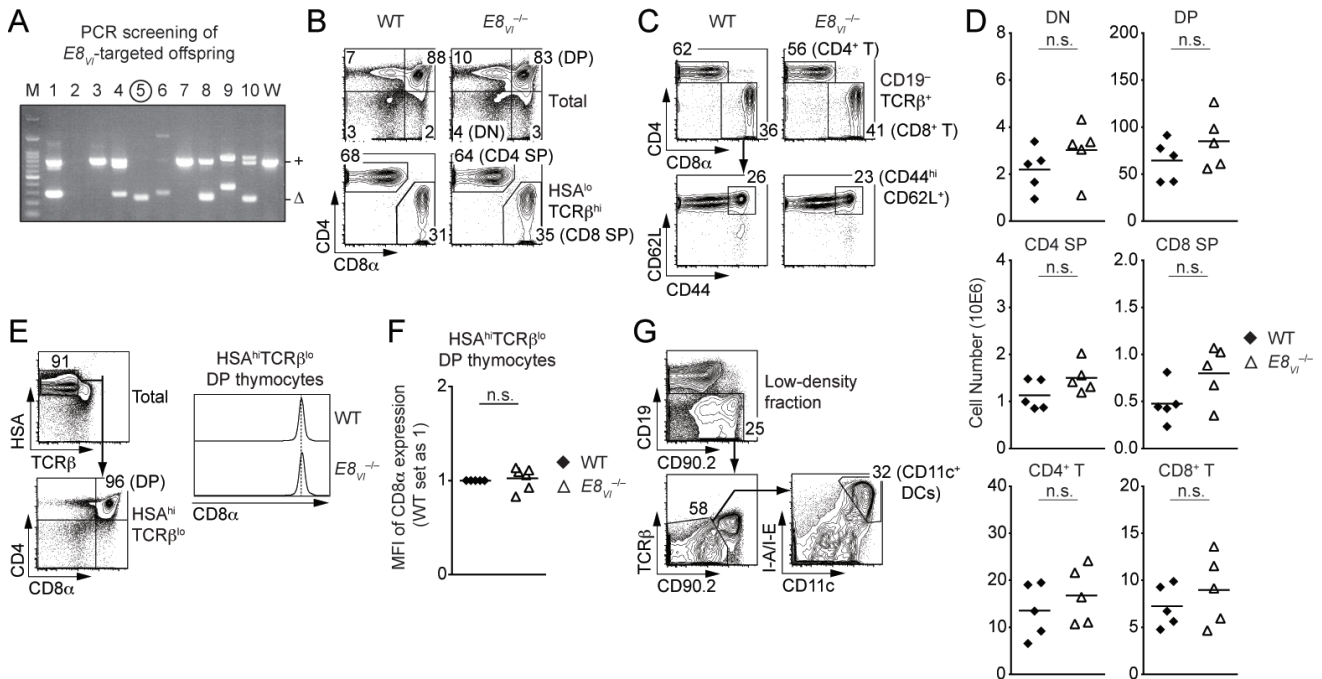

**Figure S4.** Generation and characterization of  $E8_{v1}^{-/-}$  mice. **(A)** Gel image showing the PCR screening of  $E8_{v1}$ -targeted offspring obtained from the injection of guide RNAs and *Cas9* mRNA into fertilized eggs. Ten offspring (No. 1 - 10) were screened, and No. 5 offspring (indicated by a circle) was used for the establishment of the mutant strain. The sizes of PCR products derived from wild-type and  $E8_{v1}$ -core-null alleles were indicated as + and  $\Delta$ , respectively. W, control DNA isolated from wild-type mouse; M, size markers. **(B)** Flow cytometry analysis showing  $CD8\alpha$  and  $CD4$  expression on total (upper panel) and  $HSA^{lo}TCR\beta^{hi}$  (lower panel) thymocytes isolated from wild-type (WT) and  $E8_{v1}^{-/-}$  mice.  $CD8\alpha$  expression on  $CD8^{SP}$  thymocytes ( $CD8^{SP}$ ) is displayed in Figure 3A. **(C)** Flow cytometry analysis showing  $CD8\alpha$  and  $CD4$  expression on  $CD19^{-}TCR\beta^{+}$  splenocytes (upper panel) and  $CD62L$  and  $CD44$  expression on  $CD19^{-}TCR\beta^{+}CD4^{-}CD8\alpha^{+}$  splenocytes (lower panel) isolated from wild-type (WT) and  $E8_{v1}^{-/-}$  mice.  $CD8\alpha$  expression on  $CD8^{+}$  T cells ( $CD8^{+}$  T) and  $CD8^{+}CD44^{hi}CD62L^{+}$  T cells ( $CD44^{hi}CD62L^{+}$ ) is displayed in Figure 3A. **(D)** Diagrams showing the numbers of DN (upper left), DP (upper right),  $CD4^{SP}$  (middle left) and  $CD8^{SP}$  (middle right) thymocytes as well as  $CD4^{+}$  (lower left) and  $CD8^{+}$  (lower right) T cells isolated from wild-type (WT) and  $E8_{v1}^{-/-}$  mice. **(E)** Representative gating strategy for the analysis of  $CD8\alpha$  expression on  $HSA^{hi}TCR\beta^{lo}$  DP thymocytes (left panel) and histograms showing  $CD8\alpha$  expression on  $HSA^{hi}TCR\beta^{lo}$  DP thymocytes isolated from wild-type (WT) and  $E8_{v1}^{-/-}$  mice (right panel). **(F)** Diagrams showing the relative mean fluorescence intensity (MFI) of  $CD8\alpha$  expression on  $HSA^{hi}TCR\beta^{lo}$  DP thymocytes isolated from wild-type (WT) and  $E8_{v1}^{-/-}$  mice. **(G)** Representative gating strategy for the analysis of  $CD8\alpha$  expression on DCs.  $CD4$  and  $CD8\alpha$  expression on  $CD11c^{+}$  dendritic cells (DCs) is displayed in Figure 3C. **(B,C,E,G)** Numbers indicate the percentages within the respective regions. Data are representative of 5 mice analyzed in 5 independent experiments. **(D,F)** Each dot represents one mouse. Horizontal bars indicate mean values. An unpaired Student's *t*-test **(D)** and a one-sample *t*-test **(F)** were performed for statistical analysis. "n.s.", not significant.

Figure S5

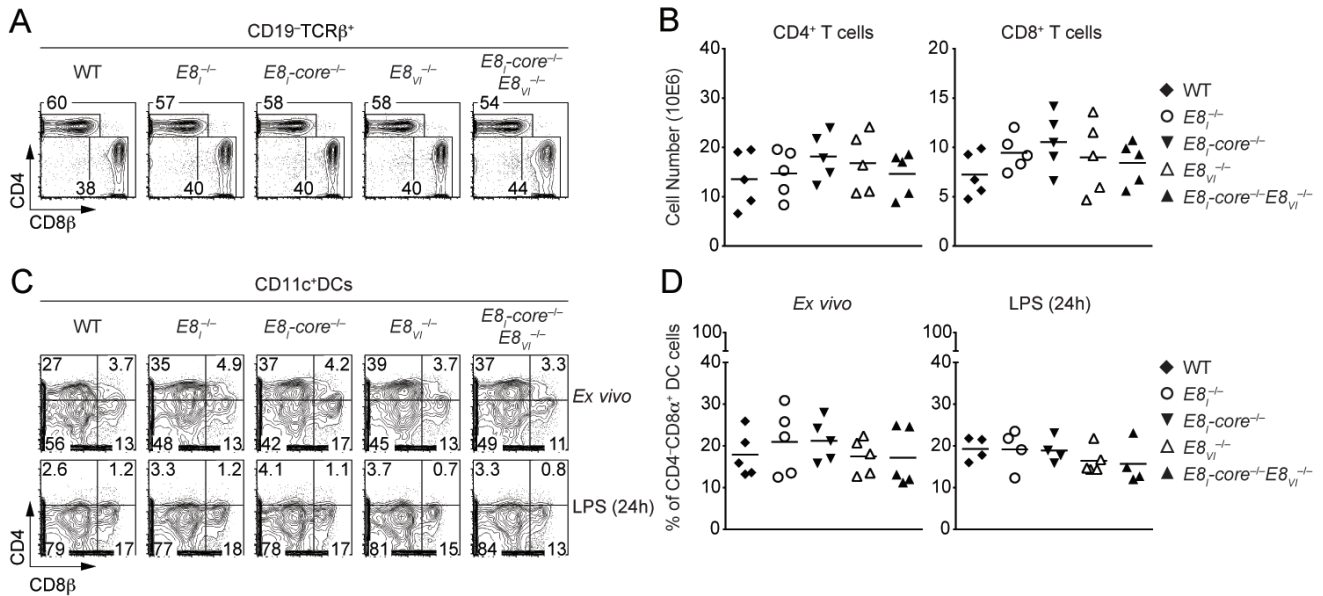

**Figure S5.** Characterization of  $E8_I\text{-core}^{-/-}$  and  $E8_I\text{-core}^{-/-}E8_{VI}^{-/-}$  mice. **(A)** Flow cytometry analysis showing CD8 $\alpha$  and CD4 expression on CD19<sup>-</sup>TCR $\beta^+$  splenocytes isolated from wild-type (WT),  $E8_I^{-/-}$ ,  $E8_I\text{-core}^{-/-}$ ,  $E8_{VI}^{-/-}$  and  $E8_I\text{-core}^{-/-}E8_{VI}^{-/-}$  mice. **(B)** Diagrams showing the numbers of splenic CD4<sup>+</sup> and CD8<sup>+</sup> T cells isolated from wild-type (WT),  $E8_I^{-/-}$ ,  $E8_I\text{-core}^{-/-}$ ,  $E8_{VI}^{-/-}$  and  $E8_I\text{-core}^{-/-}E8_{VI}^{-/-}$  mice. **(C)** Flow cytometry analysis showing CD8 $\alpha$  and CD4 expression on wild-type (WT),  $E8_I^{-/-}$ ,  $E8_I\text{-core}^{-/-}$ ,  $E8_{VI}^{-/-}$  and  $E8_I\text{-core}^{-/-}E8_{VI}^{-/-}$  splenic dendritic cells (DCs), which were either freshly isolated (upper panel) or stimulated with LPS for 24 hours (lower panel). The gating strategy for DCs is shown in Figure S4G. **(D)** Diagrams showing the percentage of the CD4<sup>-</sup>CD8 $\alpha^+$  population within wild-type (WT),  $E8_I^{-/-}$ ,  $E8_I\text{-core}^{-/-}$ ,  $E8_{VI}^{-/-}$  and  $E8_I\text{-core}^{-/-}E8_{VI}^{-/-}$  splenic dendritic cells (DCs), which were either freshly isolated (left) or stimulated with LPS for 24 hours (right). **(A,C)** Numbers indicate the percentages within the respective regions. Data are representative of 5 mice analyzed in 5 independent experiments. **(B,D)** Each dot represents one mouse. Horizontal bars indicate mean values. A one-way ANOVA analysis followed by Tukey's multiple-comparison test was performed for statistical analysis. No comparison between two groups reached a statistically significant level (i.e.  $p < 0.05$ )

Figure S6

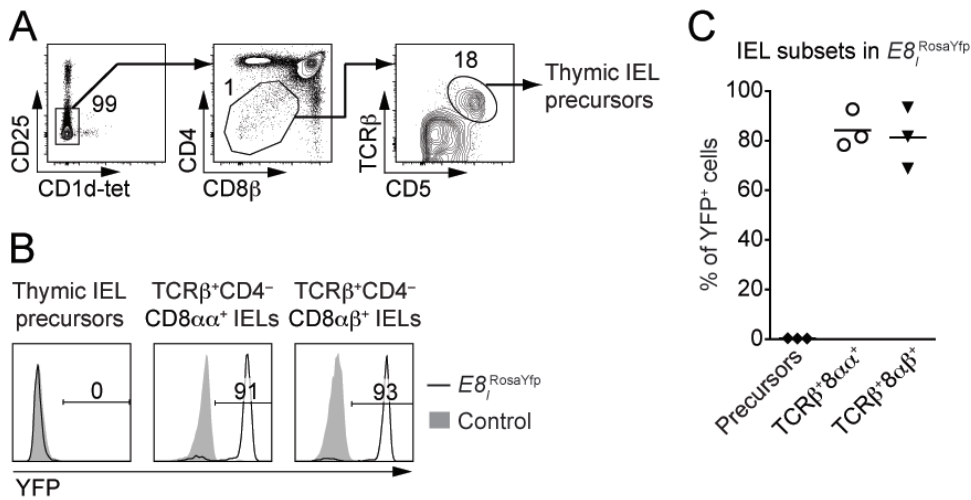

**Figure S6.**  $E8_I$  is not active in thymic IEL precursors. **(A)** Representative gating strategy for the analysis of  $E8_I$  activity in thymic IEL precursors (defined as CD1d-tetramer (PBS57-loaded)<sup>-</sup>CD25<sup>-</sup>CD4<sup>-</sup>CD8<sup>-</sup>TCRβ<sup>+</sup>CD5<sup>+</sup>). **(B)** Histograms showing YFP expression on thymic IEL precursors, TCRβ<sup>+</sup>CD4<sup>-</sup>CD8αα<sup>+</sup> and TCRβ<sup>+</sup>CD4<sup>-</sup>CD8αβ<sup>+</sup> IELs isolated from *E8<sub>I</sub>-Cre,Rosa26-stop-YFP* (*E8<sub>I</sub><sup>RosaYfp</sup>*) and *E8<sub>I</sub>-Cre* control (control) mice. Numbers indicate the percentages of YFP<sup>+</sup> cells in individual *E8<sub>I</sub><sup>RosaYfp</sup>* IEL subsets. **(C)** Diagram showing the percentage of the YFP<sup>+</sup> population within thymic IEL precursors (precursors), TCRβ<sup>+</sup>CD4<sup>-</sup>CD8αα<sup>+</sup> and TCRβ<sup>+</sup>CD4<sup>-</sup>CD8αβ<sup>+</sup> IELs isolated from *E8<sub>I</sub><sup>RosaYfp</sup>* mice. Each dot represents one mouse. Horizontal bars indicate mean values. Data are representative of 3 mice analyzed in 3 independent experiments.

**Figure S7**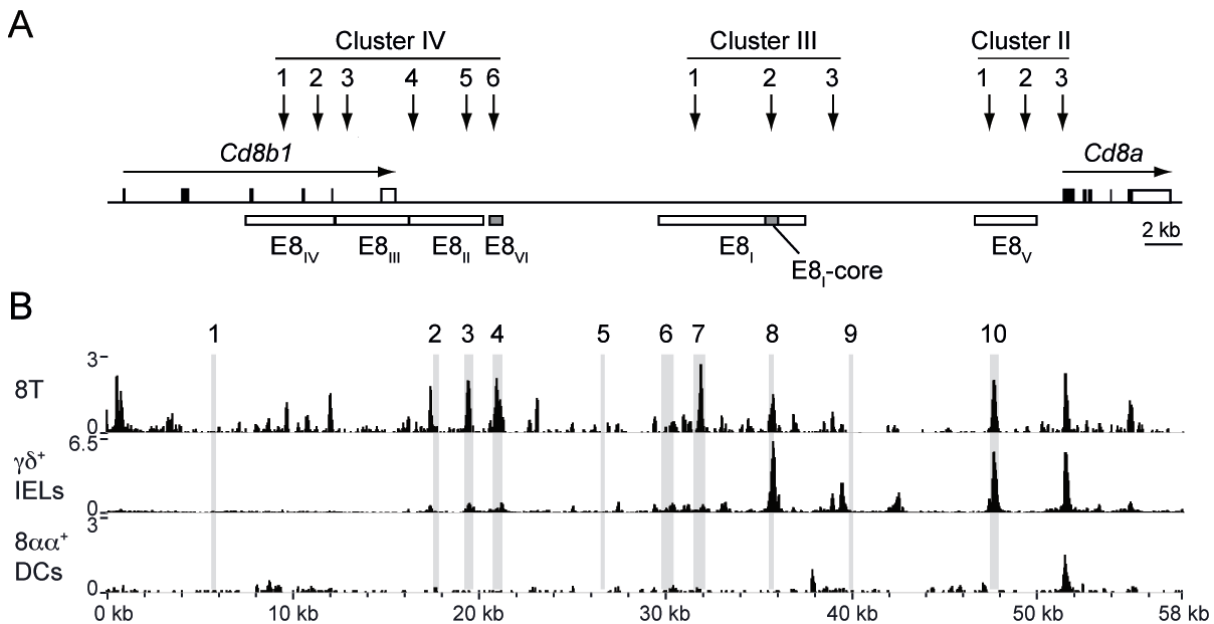

**Figure S7.** Chromatin accessibility at the *Cd8abl* gene complex in TCR $\gamma\delta^+$  IELs and CD8 $\alpha\alpha^+$  DCs. **(A)** Schematic map of the *Cd8a* and *Cd8b1* gene loci. See the figure legend of Figure 1 for further explanation. **(B)** UCSC genome browser snapshots showing the ATAC-seq signals at the *Cd8abl* gene complex (GRCm38/mm10, chr6: 71322001-71380000) in CD8 $^+$  T cells (8T), TCR $\gamma\delta^+$  IELs ( $\gamma\delta^+$  IELs) and CD8 $\alpha\alpha^+$  DCs ( $8\alpha\alpha^+$  DCs). The ATAC-seq data of CD8 $^+$  T cells and CD8 $\alpha\alpha^+$  DCs were obtained from the Immunological Genome Project (ImmGen) (3), whereas the data of TCR $\gamma\delta^+$  IELs (isolated from conventionally-raised C57BL/6J mice) were retrieved from GSE89646 (4). Shaded bars indicate the location of ECR1 to ECR10 as previously described (5).



**Supplementary Tables****Table S1. Antibodies used in this study**

| <b>Antigen</b>         | <b>Clone or Catalog number (#)</b> | <b>Company</b>            |
|------------------------|------------------------------------|---------------------------|
| CD4                    | RM4-5                              | Thermo Fisher Scientific  |
| CD5                    | 53-7,3                             | BD Biosciences            |
| CD8 $\alpha$           | 53-6.7                             | Thermo Fisher Scientific  |
| CD8 $\beta$            | H35-17.2                           | Thermo Fisher Scientific  |
| CD11c                  | N418                               | Thermo Fisher Scientific  |
| CD19                   | 1D3                                | Biolegend                 |
| CD24                   | M1/69                              | Thermo Fisher Scientific  |
| CD25                   | PC61                               | Biolegend                 |
| CD44                   | IM7                                | Biolegend                 |
| CD62L                  | MEL-14                             | Thermo Fisher Scientific  |
| CD90.2                 | 53-2.1                             | Biolegend                 |
| CD103                  | 2E7                                | Biolegend                 |
| hCD2                   | LFA-2                              | Thermo Fisher Scientific  |
| I-A/I-E                | M5/114.15.2                        | Biolegend                 |
| Mouse IgG <sub>1</sub> | RMG1-1                             | Biolegend                 |
| Rat IgG                | #8885                              | Cell Signaling Technology |
| Runx3                  | R3-5G4                             | BD Biosciences            |
| ThPOK                  | D9V5T                              | Cell Signaling Technology |
| TCR $\beta$            | H57-597                            | Thermo Fisher Scientific  |
| TCR $\gamma\delta$     | GL3                                | BD Biosciences            |

**Table S2. Genomic sequence surrounding the E8<sub>1</sub>-core region**

Chr6: 71357410 – 71358228 (GRCm38/mm10):

TTCCCATGAGGAACAGAGCTGGAAAAGCCCATCAGAAGGGCAGCCGACAGGGAGAAGA  
GACTTTTGAACAAGCCAGCCACCCAAGGATTCACCATTCAGAGAGACCTGTCTATGTG  
GGGGCTACCTCTGTCTCCCACAGCTGTGCTGGGGTCTTGTTAAAAGTGAAACTGACTTTC  
AGAGGGTTCTGGGGGCGTTTGCTACAGGAAAGTCGATGTTCCACTTCAGGGTCCAATA  
GCCTCAAACAAAGCCTCTTGCTTGCTTTCAGCTTCTGGGGCCCCTTGGTGCCTCTGCTA  
CTTCTAGATGTTTCTGAGGTTACAGCAGGCCACAGCATGTTCCAGTCTAGGCAGAGGAA  
ATATAAAAACCAATGCGAATGTGACTCAAGACCCCCTCGTGCTTCTACAGCACCACACA  
GCTGGAAATGGCAAAGTCTGCCGGCTTCCGGGTTCCACCATTGCCGGGAAGCCACTTCC  
TTTTCTCCCAACCAATGAGATCGGCATCTGAGATCCATTCAGTAGATGAGGAATAAGA  
TCAGAAAGGCTCAGGTCATACTGATCACACCGCATTAAATAAAGTCCTGAGCTAGGACTC  
AGCCCAGCGGCCTGACCTGACTTAACCTATGAGTGGGGATGTGACAGAGCTCAGTGGTC  
CATTCACAAGCTTCATGGACGTAGAAAAGGAACCTGGGAGCAGGCCAGTGTAGCCTTAT  
ACAAACCTGGGGTTATTGGATTTGAGGGGGATAAGACAACAATATAGTTCATTATAGTT  
GAGTCTGTAGTTCAAAGCAGATAAAAGCCAGAGAGTCAGAAGCTGAGTATGG

Underline: E8<sub>1</sub>-core region

Blue: Genotyping primer-binding sequences

**Table S3. Sequence of the E8<sub>I</sub>-core-null allele in *E8<sub>I</sub>-core*<sup>-/-</sup> and *E8<sub>I</sub>-core*<sup>-/-</sup>*E8<sub>VI</sub>*<sup>-/-</sup> mice**

TTCCCATGAGGAACAGAGCTGGAAAAGCCCATCAGAAGGGCAGCCGACAGGGAGAAGA  
 GACTTTTGAACAAGCCCAGCCACCCAAGGATTCAGGGCGAATTCATAACTTCGTATAGC  
 ATACATTATACGAAGTTATCTCGAGCTTCATGGACGTAGAAAAGGAACCTGGGAGCAGG  
 CCAGTGTAGCCTTATACAAACCTGGGGTTATTGGATTTGAGGGGGATAAGACAACAATA  
 TAGTTCATTATAGTTGAGTCTGTAGTTCAAAGCAGATAAAGCCAGAGAGTCAGAAGCTG  
 AGTATGG

Blue: Genotyping primer-binding sequences

Gray background: Insertion (i.e. a loxP site and its surrounding sequence derived from construction)

**Table S4. Genomic sequence surrounding the E8<sub>VI</sub> region**

Chr6: 71342503-71343251 (GRCm38/mm10):

CCATCAGGTACTTGGGAATGCTCAGTTCTACCCAGAATAGGTGACACAAGCTTAGCGGTC  
ACAGAAAGAACACACGCCCAACCATGTAGCTGTCAGTGAGCACGTGTATCC**CAGCCCTG**  
**AGCTGACATTCATGG**ACAACTCAAGGCCAGCACTTGCATGACTCTGAGAACAACCTGCC  
CCAATGGCCCACTGGCTACTCCTTAGTCTCAGCCCTGGACAAATGGACAGAAAAATTCT  
GGGATGGTATGACCTGAGGCAGAGGCCAAAAATTGGCTTTGAGAAGTCTTAACAGTCTCT  
CACAGGAGATTTCATGAAGGTCTCTGGGGTTGGGTGGGGATAAAGATAAGAGGGGAAG  
AATTGAGCTGGTGTGGGTTAGGGGTGGAGGCCACCTTCCCCAACACTCCCCTCCCCAG  
CACCTCCAGCATCCTGTAAGCCACAAGCTACGGGCTACACAAGGCCAGGCTCAAGGCAG  
GCCATGACCCCTGTGCTCCACCCTCTCTTACCACAGGCTTCTGCCACCCTCAGGGTACAC  
AATGGGAAACTCGACCATCACAAAGCTCTAACTGTCTTCAAGCTTGAGCAAGAGAAGGG  
GAGTCCAAGCTGACCCCTTCTTCATCTAGCACCCACCCCGAAG**CCACACTGCTGCTTAAA**  
**CTCAGA**CGTGCGGAAGTAGAATGGTTTCCGTAGGCAAGGAGGACTGACTAGAAGACCTT  
GTATGGGTTTTCCAT**CCCATATCCTGTGATCTACTTTGTG**

Underline: E8<sub>VI</sub> region

Red: Guide-RNA binding sequences

Blue: Genotyping primer-binding sequences

**Table S5. Sequences of the E8<sub>VI</sub>-null allele in *E8<sub>VI</sub>*<sup>-/-</sup> and *E8<sub>I</sub>-core*<sup>-/-</sup>*E8<sub>VI</sub>*<sup>-/-</sup> mice***E8<sub>VI</sub>*<sup>-/-</sup> mice:

CCATCAGGTA**CTTGGGAATGCTCAGT**CTACCCAGAATAGGTGACACAAGCTTAGCGGTC  
 ACAGAAAGAACACACG**CCCAACCATGTAGCTGTCAGTGAGCACGTGTATCC**CAGCC**CTG**  
 ACCTTAA**ACTCAGA**CGTGCGGAAGTAGAATGGTTTCCGTAGGCAAGGAGGACTGACTAG  
 AAGACCTTGTATGGGTTTTCCAT**CCCATATCCTGTGATCTACTTTGTG**

Red: Guide RNA-binding sequences

Blue: Genotyping primer-binding sequences

Gray background: Insertions

*E8<sub>I</sub>-core*<sup>-/-</sup>*E8<sub>VI</sub>*<sup>-/-</sup> mice:

CCATCAGGTA**CTTGGGAATGCTCAGT**CTACCCAGAATAGGTGACACAAGCTTAGCGGTC  
 ACAGAAAGAACACACG**CCCAACCATGTAGCTGTCAGGAGCACGTGTATCC**CAGTTATA**G**  
 CTGCTTAA**ACTCAGA**CGTGCGGAAGTAGAATGGTTTCCGTAGGCAAGGAGGACTGACTA  
 GAAGACCTTGTATGGGTTTTCCAT**CCCATATCCTGTGTCTACTTTGTG**

Red: Guide RNA-binding sequences

Blue: Genotyping primer-binding sequences

Gray background: Insertions

**References**

1. Gorman, S. D., Y. H. Sun, R. Zamoyska, and J. R. Parnes. Molecular linkage of the Ly-3 and Ly-2 genes. Requirement of Ly-2 for Ly-3 surface expression. *J Immunol.* (1988) 140:3646-3653.
2. Sawada, S., J. D. Scarborough, N. Killeen, and D. R. Littman. A lineage-specific transcriptional silencer regulates CD4 gene expression during T lymphocyte development. *Cell.* (1994) 77:917-929.
3. Heng, T. S., and M. W. Painter. The Immunological Genome Project: networks of gene expression in immune cells. *Nat Immunol.* (2008) 9:1091-1094. doi: 10.1038/ni1008-1091
4. Semenkovich, N. P., J. D. Planer, P. P. Ahern, N. W. Griffin, C. Y. Lin, and J. I. Gordon. Impact of the gut microbiota on enhancer accessibility in gut intraepithelial lymphocytes. *Proc Natl Acad Sci U S A.* (2016) 113:14805-14810. doi: 10.1073/pnas.1617793113
5. Sakaguchi, S., M. Hombauer, H. Hassan, H. Tanaka, N. Yasmin, Y. Naoe, et al. A novel Cd8-cis-regulatory element preferentially directs expression in CD44<sup>hi</sup>CD62L<sup>+</sup> CD8<sup>+</sup> T cells and in CD8 $\alpha$ <sup>+</sup> dendritic cells. *J Leukoc Biol.* (2015) 97:635-644. doi: 10.1189/jlb.1HI1113-597RR
